# Supplementary material for: Construction of Co/Co2P/VN heterointerfaces enhances trifunctional hydrogen and oxygen catalytic reactions
Source: Royal Society of Chemistry journal article supplement (doi:10.1039/d4ta06778a), 2024-01-01
Supplement: d4ta06778a1.pdf [file d4ta06778a1.pdf]

## Supporting Information

### **Construction of Co/Co<sub>2</sub>P/VN heterointerfaces enhances trifunctional hydrogen and oxygen catalytic reactions**

*Yixuan Huang<sup>1</sup>, Mengyao Li<sup>1,\*</sup>, Zhenting Liu<sup>2</sup>, Chun-Ho Lin<sup>1</sup>, Peiyuan Guan<sup>1</sup>, Zijian Feng<sup>1</sup>, Yingze Zhou<sup>1</sup>, Zekun Dong<sup>1</sup>, Jinbo Wang<sup>1</sup>, Chao Liu<sup>1</sup>, Tao Wan<sup>1</sup>, Xiaoyi Li<sup>2,\*</sup>, Zhaojun Han<sup>3,\*</sup>, Dewei Chu<sup>1</sup>*

<sup>1</sup> School of Materials Science and Engineering, University of New South Wales, Sydney, NSW 2052, Australia

<sup>2</sup> School of Material Science and Engineering, International S&T Cooperation Foundation of Shaanxi Province, Shaanxi University of Science and Technology, Xi'an 710021, China

<sup>3</sup> School of Mechanical, Medical and Process Engineering, Queensland University of Technology, Brisbane 4000, Australia

Corresponding authors:

[mengyao.li1@unsw.edu.au](mailto:mengyao.li1@unsw.edu.au) (M. L.)

[bs210211007@sust.edu.cn](mailto:bs210211007@sust.edu.cn) (X. L.)

[zhaojun.han@qut.edu.au](mailto:zhaojun.han@qut.edu.au) (Z. H.)

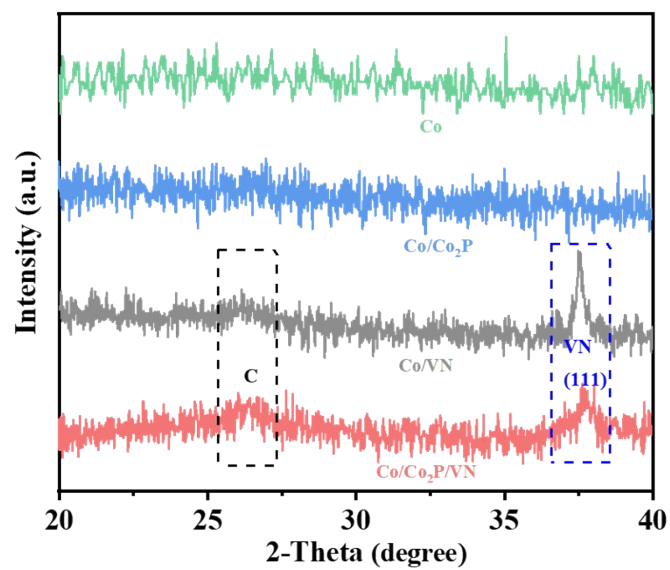

**Fig. S1** XRD patterns with the zoomed-in image of Co, Co/Co<sub>2</sub>P, Co/VN, and Co/Co<sub>2</sub>P/VN.

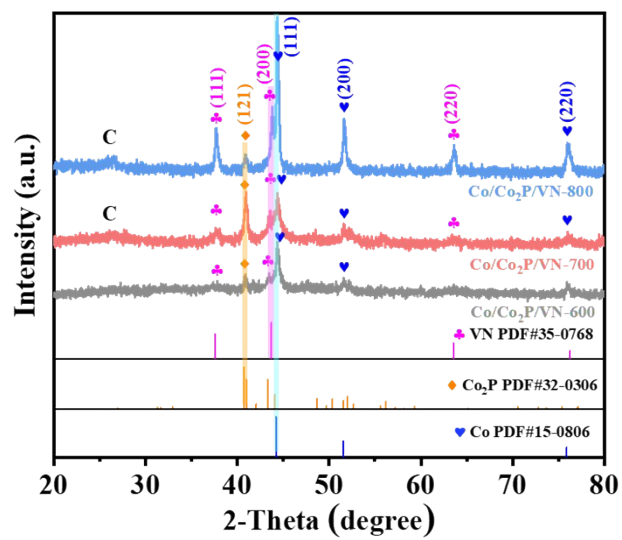

**Fig. S2** XRD patterns of Co/Co<sub>2</sub>P/VN with different pyrolysis temperatures (600, 700, and 800 °C).

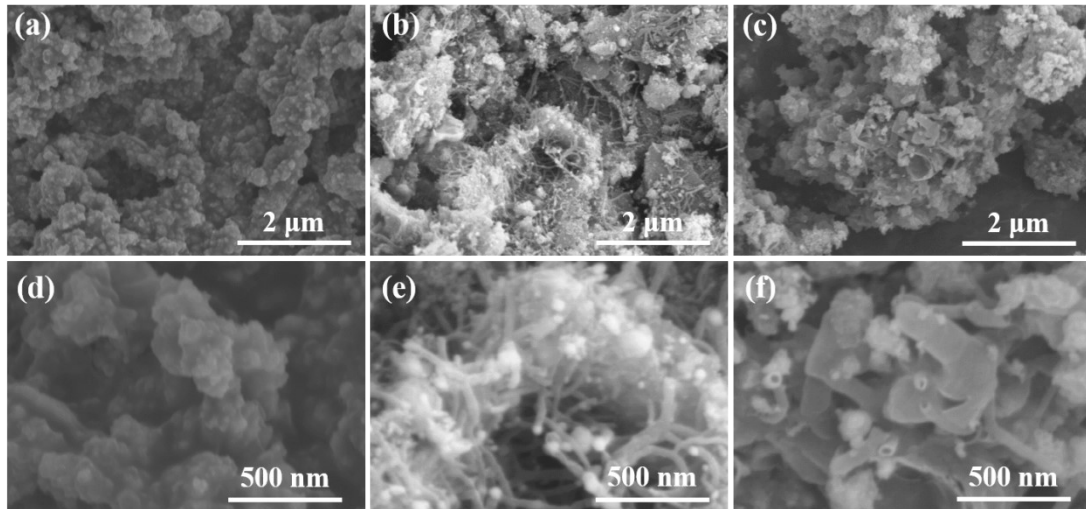

**Fig. S3** SEM images of Co/Co<sub>2</sub>P/VN with different pyrolysis temperatures: (a, d) Co/Co<sub>2</sub>P/VN-600; (b, e) Co/Co<sub>2</sub>P/VN-700; (c, f) Co/Co<sub>2</sub>P/VN-800.

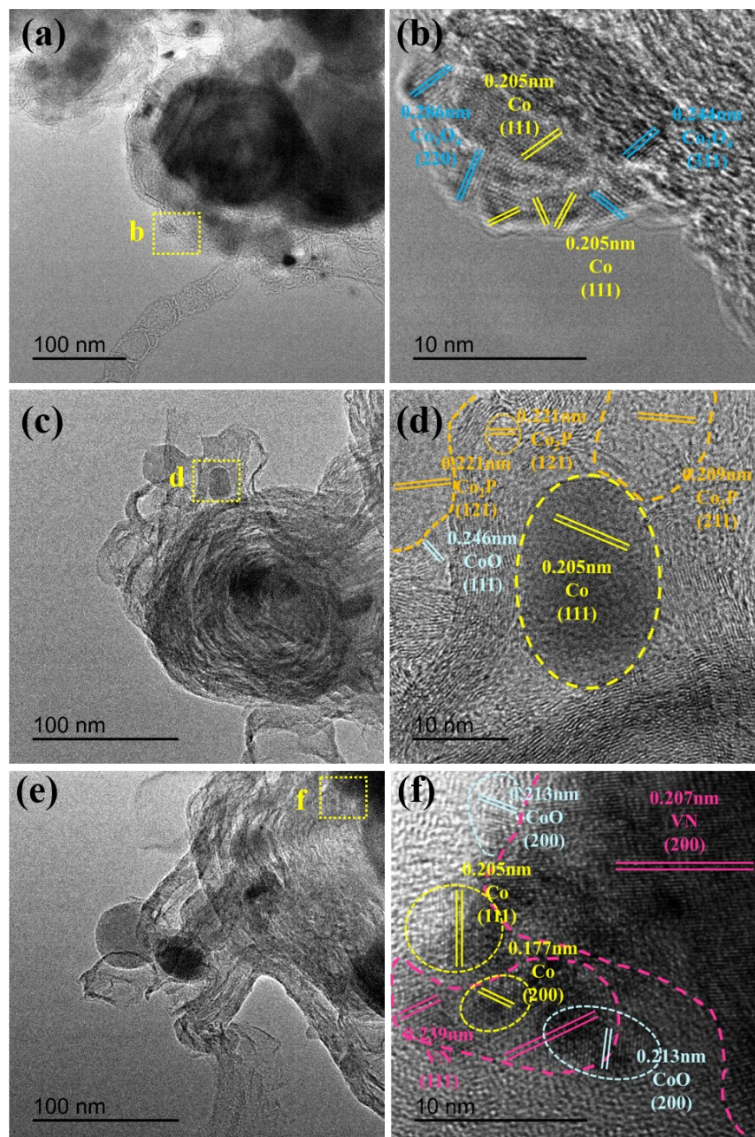

**Fig. S4** TEM and HRTEM images of (a, b) Co, (c, d) Co/Co<sub>2</sub>P, and (e, f) Co/VN.

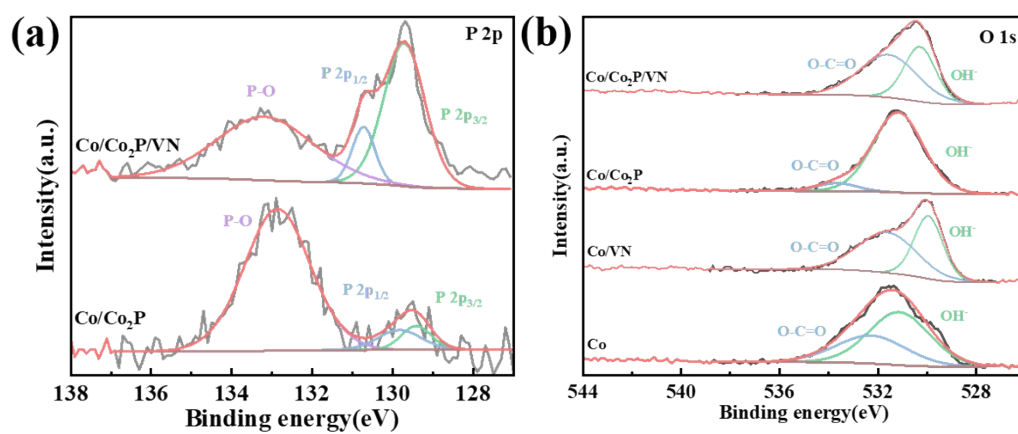

**Fig. S5** The high-resolution XPS spectra: (a) P 2p of Co/Co<sub>2</sub>P and Co/Co<sub>2</sub>P/VN samples; and (b) O 1s of Co, Co/Co<sub>2</sub>P, Co/VN and Co/Co<sub>2</sub>P/VN samples.

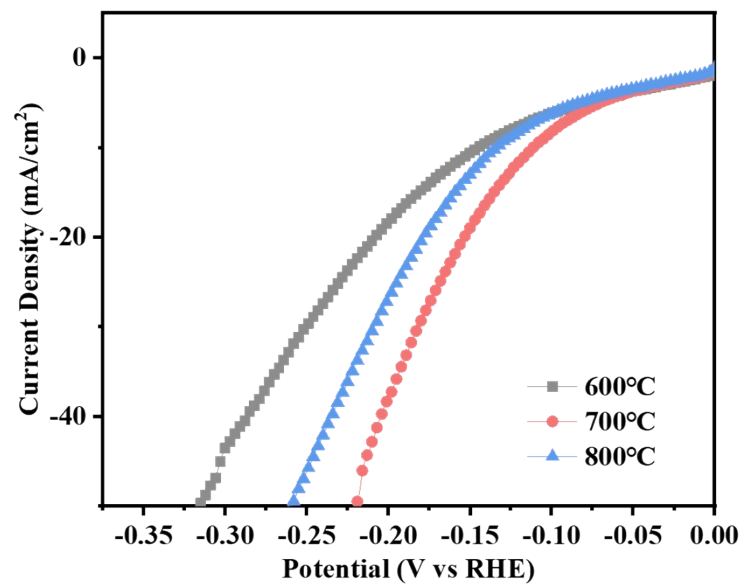

**Fig. S6** HER polarization curves of Co/Co<sub>2</sub>P/VN with different pyrolysis temperatures in 1.0 M KOH solution.

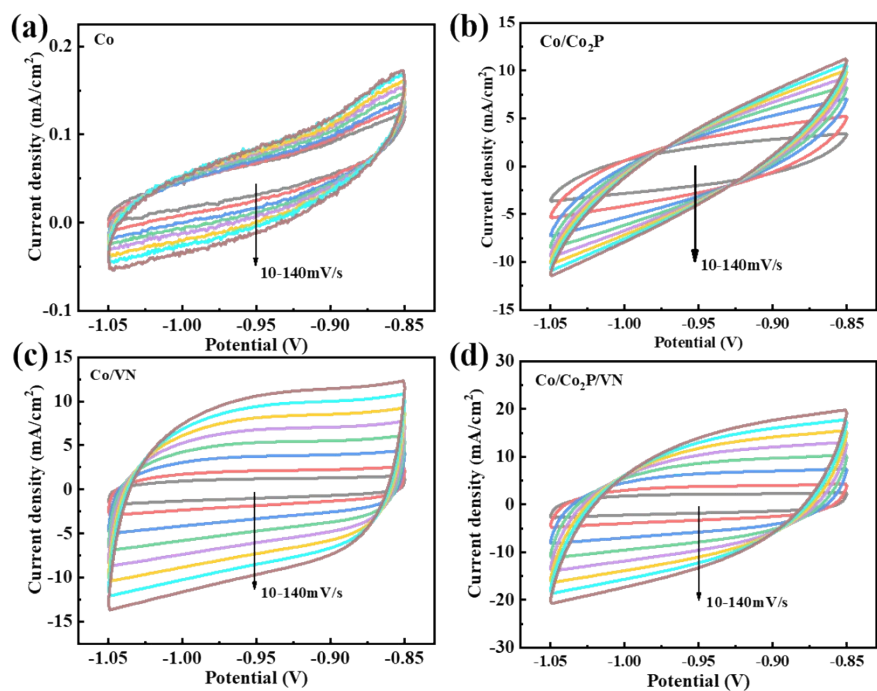

**Fig. S7** Cyclic voltammetry curves of (a) Co, (b) Co/Co<sub>2</sub>P, (c) Co/VN, and (d) Co/Co<sub>2</sub>P/VN catalysts with different scanning rates (10, 20, 40, 60, 80, 100, 120, 140 mV/s) for HER in 1.0 M KOH solution.



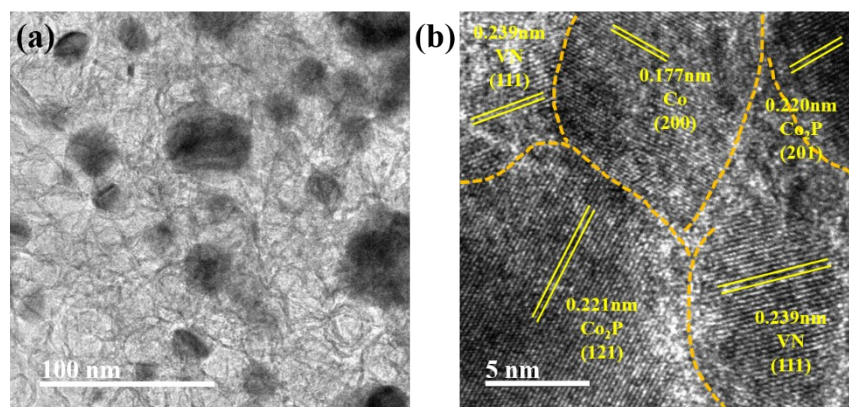

**Fig. S8** (a) TEM and (b) HRTEM images of Co/Co<sub>2</sub>P/VN after HER chronoamperometry test in 1.0 M KOH electrolyte.

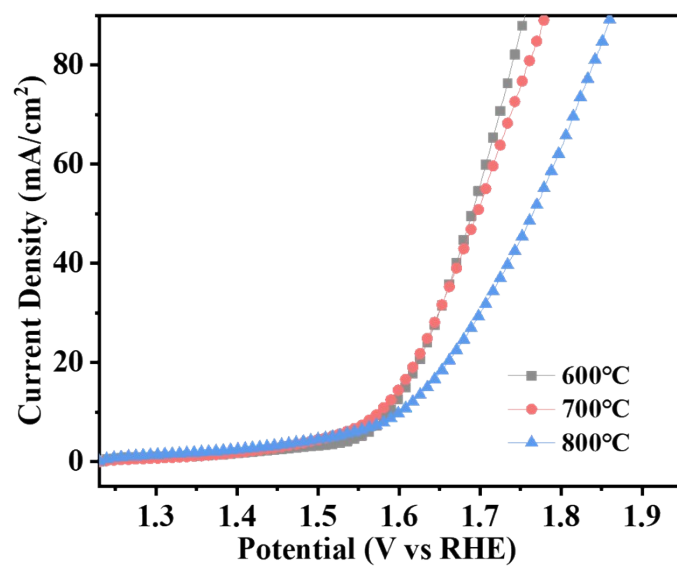

**Fig. S9** LSV polarization curves of Co/Co<sub>2</sub>P/VN with different pyrolysis temperatures in 1.0 M KOH solution.

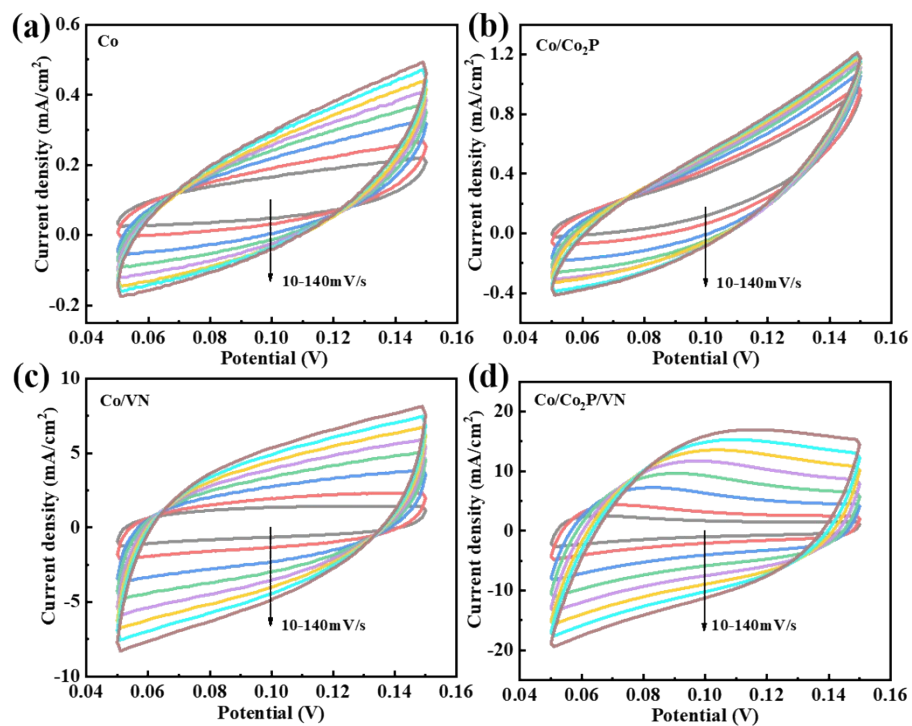

**Fig. S10** Cyclic voltammetry curves of (a) Co, (b) Co/Co<sub>2</sub>P, (c) Co/VN, and (d) Co/Co<sub>2</sub>P/VN catalysts with different scanning rates (10, 20, 40, 60, 80, 100, 120, 140 mV/s) for OER in 1.0 M KOH solution.

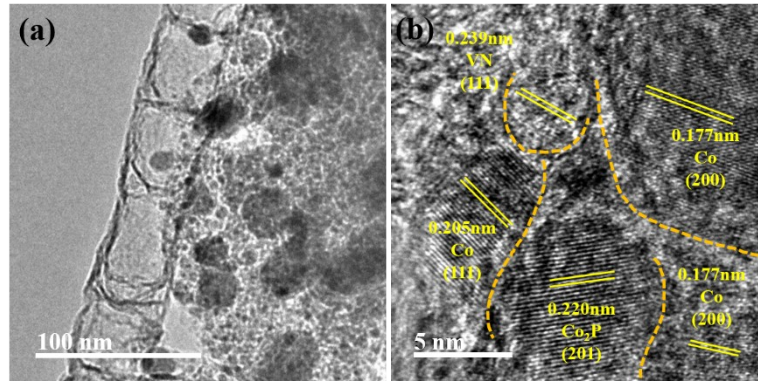

**Fig. S11** (a) TEM and (b) HRTEM images of Co/Co<sub>2</sub>P/VN after OER chronoamperometry test in 1.0 M KOH electrolyte.

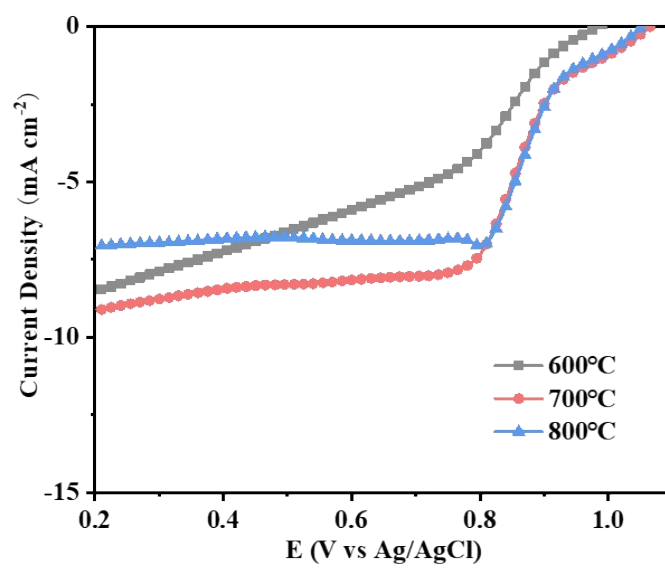

**Fig. S12** RDE voltammetry curves of Co/Co<sub>2</sub>P/VN with different pyrolysis temperatures in 1.0 M KOH solution.

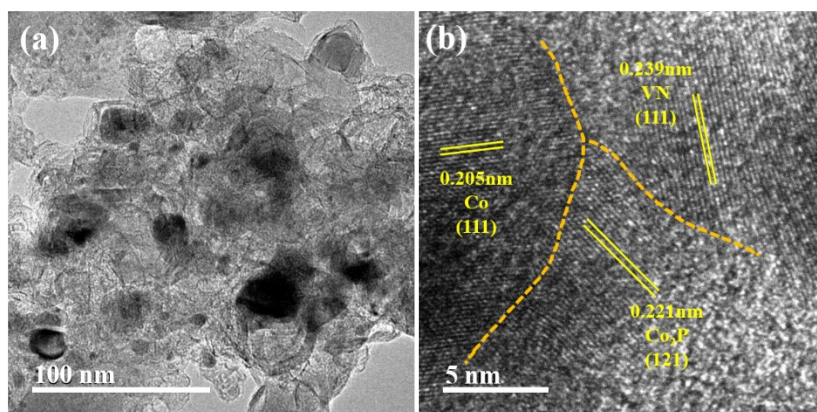

**Fig. S13** (a) TEM and (b) HRTEM images of Co/Co<sub>2</sub>P/VN after ORR chronoamperometry test in 0.1 M KOH electrolyte.

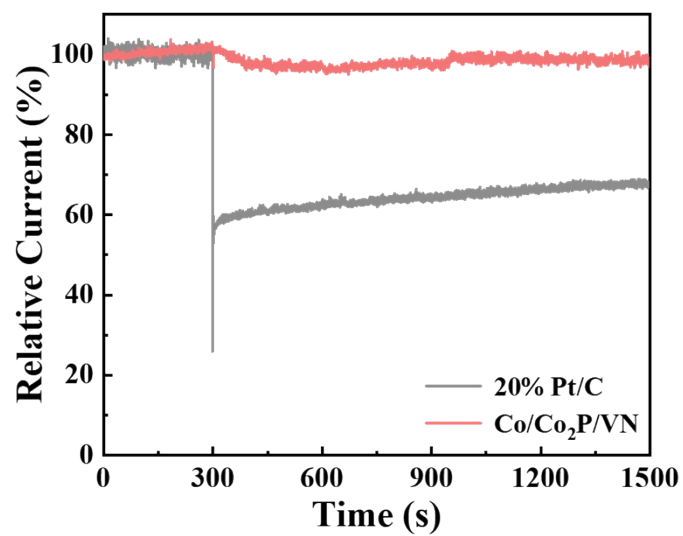

**Fig. S14** The stability evaluation for Co/Co<sub>2</sub>P/VN and Pt/C catalysts in O<sub>2</sub>-saturated 0.1 M KOH with the injection of 3.0 M methanol.

**Table S1.** The details for calculated fractions of each nitrogen species in the N 1s XPS spectrum.

| <b>Fraction of</b>           |                |                    |                   |                    |                   |
|------------------------------|----------------|--------------------|-------------------|--------------------|-------------------|
| <b>each</b>                  | <b>Metal-N</b> | <b>Pyridinic-N</b> | <b>Pyrrolic-N</b> | <b>Graphitic-N</b> | <b>Oxidized--</b> |
| <b>nitrogen</b>              | <b>[%]</b>     | <b>[%]</b>         | <b>[%]</b>        | <b>[%]</b>         | <b>N [%]</b>      |
| <b>species</b>               |                |                    |                   |                    |                   |
| <b>Co/Co<sub>2</sub>P/VN</b> | 11.33          | 20.79              | 23.98             | 39.22              | 4.69              |
| <b>Co/VN</b>                 | 27.75          | 28.91              | 19.13             | 17.69              | 6.52              |



**Table S2.** Fitted data from Nyquist plots of as-prepared samples toward HER.

| <b>Electrocatalysts</b>      | <b><math>R_{ct}</math> (<math>\Omega</math>)</b> |
|------------------------------|--------------------------------------------------|
| <b>Co</b>                    | 80.96                                            |
| <b>Co/Co<sub>2</sub>P</b>    | 47.02                                            |
| <b>Co/VN</b>                 | 39.50                                            |
| <b>Co/Co<sub>2</sub>P/VN</b> | 23.55                                            |

**Table S3.** Electrocatalytic HER performance of the Co/Co<sub>2</sub>P/VN material compared with that of reported Co-based, Co<sub>2</sub>P-based, or VN-based electrocatalysts in 1.0 M KOH electrolyte.

| Catalysts                     | Electrolyte | Current density ( <i>j</i> , mA cm <sup>-2</sup> ) | Overpotential at corresponding <i>j</i> (mV) | Stability test | Reference                                                          |
|-------------------------------|-------------|----------------------------------------------------|----------------------------------------------|----------------|--------------------------------------------------------------------|
| Co/Co <sub>2</sub> P/VN       | 1.0 M KOH   | 10                                                 | 111                                          | 50 h           | This work                                                          |
| Co <sub>2</sub> P/CoP@Co@NCNT | 1.0 M KOH   | 10                                                 | 118                                          | 50 h           | Chemical Engineering Journal. 2022, 430(2): 123877                 |
| Co/WN                         | 1.0 M KOH   | 10                                                 | 143                                          | 30 h           | International Journal of Hydrogen Energy. 2022, 06(061): 0360-3199 |
| Co  Cu/NC                     | 1.0 M KOH   | 10                                                 | 210                                          | 24 h           | ACS Sustainable Chemistry & Engineering. 2022, 10(18): 5986-5997   |
| Co@NC                         | 1.0 M KOH   | 10                                                 | 220                                          | 40000 s        | Journal of Solid State Chemistry. 2022, 309: 122989                |
| Co <sub>2</sub> P/CoNPC       | 1.0 M KOH   | 10                                                 | 208                                          | 30000 s        | Advanced Materials. 2022, 32(36): 2003649                          |
| FeCo/Co <sub>2</sub> P@NP CF  | 1.0 M KOH   | 10                                                 | 260                                          | 1000 cycles    | Advanced Energy Materials. 2020, 10(10): 1903854                   |
| VN/Co-NC                      | 1.0 M KOH   | 10                                                 | 44                                           | 75 h           | Energy & Environmental Science. 2021, 14(5): 3160-3173             |
| VN/Co@NCNT                    | 1.0 M KOH   | 10                                                 | 180                                          | 60 h           | Journal of Alloys and Compounds. 2021, 853: 157257                 |
| VN/WN@NC                      | 1.0 M KOH   | 10                                                 | 122                                          | 100 h          | Chemical Engineering Journal. 2021, 429: 131945                    |
| Co/N-CNT/VN                   | 1.0 M KOH   | 10                                                 | 63                                           | 20 h           | Nano Energy. 2020, 73: 104788                                      |

**Table S4.** Fitted data from Nyquist plots of as-prepared samples toward OER.

| <b>Electrocatalysts</b>      | <b><math>R_{ct}</math> (<math>\Omega</math>)</b> |
|------------------------------|--------------------------------------------------|
| <b>Co</b>                    | 118.60                                           |
| <b>Co/Co<sub>2</sub>P</b>    | 92.36                                            |
| <b>Co/VN</b>                 | 86.17                                            |
| <b>Co/Co<sub>2</sub>P/VN</b> | 55.71                                            |

**Table S5.** Electrocatalytic OER performance of the Co/Co<sub>2</sub>P/VN material compared with that of reported Co-based, Co<sub>2</sub>P-based, or VN-based electrocatalysts in 1.0 M KOH electrolyte.

| Catalysts                     | Electrolyte | Current density ( <i>j</i> , mA cm <sup>-2</sup> ) | Overpotential at corresponding <i>j</i> (mV) | Stability test | Reference                                                           |
|-------------------------------|-------------|----------------------------------------------------|----------------------------------------------|----------------|---------------------------------------------------------------------|
| Co/Co <sub>2</sub> P/VN       | 1.0 M KOH   | 10                                                 | 379                                          | 50 h           | This work                                                           |
| Co <sub>2</sub> P/CoP@Co@NCNT | 1.0 M KOH   | 10                                                 | 256                                          | 60 h           | Chemical Engineering Journal. 2022, 430(2): 123877                  |
| Co@N-PCNF                     | 1.0 M KOH   | 10                                                 | 440                                          | 200 h          | Electrochimica Acta. 2022, 411: 140090                              |
| Co@NC                         | 1.0 M KOH   | 10                                                 | 350                                          | 40000 s        | Journal of Solid State Chemistry. 2022, 309: 122989                 |
| Co <sub>2</sub> P/CoNPC       | 1.0 M KOH   | 10                                                 | 326                                          | 30000 s        | Advanced Materials. 2022, 32(36): 2003649                           |
| FeCo/Co <sub>2</sub> P@NPCF   | 1.0 M KOH   | 10                                                 | 330                                          | 1000 cycles    | Advanced Energy Materials. 2020, 10(10): 1903854                    |
| Ni <sub>3</sub> FeN/VN-NG     | 1.0 M KOH   | 10                                                 | 1.56V                                        | -              | Chemical Engineering Journal. 2022, 437(1): 135291                  |
| Co/N-CNT/VN                   | 1.0 M KOH   | 10                                                 | 240                                          | 20 h           | Nano Energy. 2020, 73: 104788                                       |
| D-Ni <sub>3</sub> N QDs/VN    | 1.0 M KOH   | 10                                                 | 226                                          | 10 h           | Journal of Materials Chemistry A. 2020, 8(40): 21173-21180          |
| CoFe-PBAs/VN                  | 1.0 M KOH   | 10                                                 | 398                                          | 30 h           | International Journal of Hydrogen Energy. 2020, 45(56): 31410-31417 |

**Table S6.** Electrocatalytic ORR performance of the Co/Co<sub>2</sub>P/VN material compared with that of reported Co-based, Co<sub>2</sub>P-based, or VN-based electrocatalysts in 1.0 M KOH electrolyte.

| Catalysts                   | E <sub>onset</sub> (V vs. RHE) | E <sub>1/2</sub> (V vs. RHE) | n <sup>a)</sup> | Reference                                                           |
|-----------------------------|--------------------------------|------------------------------|-----------------|---------------------------------------------------------------------|
| Co/Co <sub>2</sub> P/VN     | 1.070                          | 0.865                        | 3.9             | This work                                                           |
| Co@N-PCNF                   | -                              | 0.825                        | 3.72            | Electrochimica Acta. 2022, 411: 140090                              |
| TiCN-BCN-Co                 | 0.94                           | 0.83                         | 4               | International Journal of Hydrogen Energy. 2022, 47(48): 20894-20904 |
| Co-N-PCN                    | 0.90                           | 0.82                         | about 4.0       | Carbon, 2019, 141: 704-711                                          |
| Co  Cu/NC                   | -                              | 0.83                         | 3.9             | ACS Sustainable Chemistry & Engineering. 2022, 10(18): 5986-5997    |
| Co <sub>2</sub> P/CoNPC     | 0.963                          | 0.843                        | 3.87            | Advanced Materials. 2022, 32(36): 2003649                           |
| FeCo/Co <sub>2</sub> P@NPCF | 0.85                           | 0.79                         | 3.85            | Advanced Energy Materials. 2020, 10(10): 1903854                    |
| Ni <sub>3</sub> FeN/VN-NG   | -                              | 0.87                         | 3.87            | Chemical Engineering Journal. 2022, 437(1): 135291                  |
| D-Ni <sub>3</sub> N QDs/VN  | 0.963                          | 0.837                        | 3.95            | Journal of Materials Chemistry A. 2020, 8(40): 21173-21180          |
| Co-V-N/NC                   | 0.98                           | 0.85                         | 3.87            | Carbon. 2020, 159: 16-24                                            |
